# Supplementary material
Source: PubMed Central journal article supplement (PMC5581272)

1 Appendix S1

2 Declines in plant palatability from polar to tropical latitudes depend on herbivore  
3 and plant identity

4 Alyssa M. Demko<sup>1,6</sup>, Charles D. Amsler<sup>2</sup>, Mark E. Hay<sup>3</sup>, Jeremy D. Long<sup>4</sup>,  
5 James B. McClintock<sup>2</sup>, Valerie J. Paul<sup>5</sup>, Erik E. Sotka<sup>1\*</sup>

6 *Ecology*. 2017.

7 Affiliations:

8 <sup>1</sup> Department of Biology and the College of Charleston Marine Laboratory; 205 Fort Johnson  
9 Road, Charleston, SC 29412.

10 <sup>2</sup> Department of Biology, University of Alabama at Birmingham, Birmingham, Alabama 35294

11 <sup>3</sup> School of Biological Sciences and Aquatic Chemical Ecology Center, Georgia Institute of  
12 Technology, Atlanta, GA 30332-0230

13 <sup>4</sup> Department of Biology and Coastal and Marine Institute Laboratory, San Diego State  
14 University, San Diego, CA 92182

15 <sup>5</sup> Smithsonian Marine Station at Fort Pierce, 701 Seaway Drive, Fort Pierce, FL 34949

16 \* Corresponding author

17

18

19

---

<sup>6</sup> Center for Marine Biotechnology and Biomedicine, Scripps Institution of Oceanography, UC San Diego, 9500 Gilman Drive, La Jolla, CA 92093.

Emails: [demkoam@g.cofc.edu](mailto:demkoam@g.cofc.edu), [amsler@uab.edu](mailto:amsler@uab.edu), [mark.hay@biology.gatech.edu](mailto:mark.hay@biology.gatech.edu), [jlong@mail.sdsu.edu](mailto:jlong@mail.sdsu.edu), [mcclinto@uab.edu](mailto:mcclinto@uab.edu), [Paul@si.edu](mailto:Paul@si.edu), [sotkae@cofc.edu](mailto:sotkae@cofc.edu)

20 Table S1. Three-way ANOVA on palatability (%T) of seaweed from tropical (Fiji), temperate  
 21 (California) and polar (Antarctica) locations to generalist marine herbivores. “% Variance”  
 22 indicates the proportion of the Mean Sums of Squares that is explained by a factor or interaction  
 23 term.

24

|                             | df | Sum sq | Mean sq | F value | <i>p</i> -value | % Var |
|-----------------------------|----|--------|---------|---------|-----------------|-------|
| Zone                        | 2  | 6437   | 3218    | 18.774  | <0.001          | 0.22  |
| Division                    | 1  | 10     | 10      | 0.061   | 0.806           | 0.00  |
| Herbivore                   | 1  | 8185   | 8185    | 47.746  | <0.001          | 0.57  |
| Zone x division             | 2  | 1233   | 616     | 3.596   | 0.032           | 0.04  |
| Zone x herbivore            | 2  | 2663   | 1331    | 7.766   | 0.001           | 0.09  |
| Division x herbivore        | 1  | 110    | 110     | 0.642   | 0.425           | 0.01  |
| Zone x division x herbivore | 2  | 1431   | 716     | 4.175   | 0.019           | 0.05  |
| Residuals                   | 88 | 15085  | 171     |         |                 | 0.01  |

25

26

27

28 Table S2. Amplification and sequencing primers.

| Seaweed Division        | Primer   | Direction | Sequence (5'-3')                   | Reference                     |
|-------------------------|----------|-----------|------------------------------------|-------------------------------|
| Phaeophyta & Rhodophyta | F-566    | Forward   | CAG CAG CCG CGG<br>TAA TTC C       | Hadziavdic <i>et al.</i> 2014 |
| Phaeophyta & Rhodophyta | R-1200   | Reverse   | CCC GTG TTG AGT<br>CAA ATT AAG C   | Hadziavdic <i>et al.</i> 2014 |
| Phaeophyta              | RbcL68F  | Forward   | TGC CWA AAT GGG<br>RWA YTG GGA TGC | Draisma <i>et al.</i> 2001    |
| Phaeophyta              | RbcL496R | Reverse   | ACG WCC AAA TKT<br>RTC TAA TCT     | Draisma <i>et al.</i> 2001    |
| Rhodophyta              | F-57     | Forward   | GTA ATT CCA TAT<br>GCT AAA ATG GG  | Hommersand <i>et al.</i> 1994 |
| Rhodophyta              | R-753    | Reverse   | GCT CTT TCA TAC<br>ATA TCT TCC     | Hommersand <i>et al.</i> 1994 |

29

30

31

32 Table S3. Source of sequences used in the construction of phylogenetic trees.

| Sequence Source |             | Species                                                                                                                                                                                                                                                                                                                                                                                                                                                                                                                                                                                                                                                                                                                                                                                                                                                                                                                                                             |
|-----------------|-------------|---------------------------------------------------------------------------------------------------------------------------------------------------------------------------------------------------------------------------------------------------------------------------------------------------------------------------------------------------------------------------------------------------------------------------------------------------------------------------------------------------------------------------------------------------------------------------------------------------------------------------------------------------------------------------------------------------------------------------------------------------------------------------------------------------------------------------------------------------------------------------------------------------------------------------------------------------------------------|
| 18S             | <i>rbcL</i> |                                                                                                                                                                                                                                                                                                                                                                                                                                                                                                                                                                                                                                                                                                                                                                                                                                                                                                                                                                     |
| This study      | This study  | <i>Padina sp.</i> , <i>Adenocystis utricularis</i> , <i>Petalonia binghamiae</i> , <i>Hormophysa sp.</i> , <i>Silvetia compressa</i> , <i>Halidrys siliquosa</i> , <i>Sargassum sp.</i> , <i>Turbinaria sp.</i> , <i>Laminaria sp.</i> , <i>Macrocystis pyrifera</i> , <i>Egregia sp.</i> , <i>Eisenia sp.</i> , <i>Delisea pulchra</i> , <i>Bossiella sp.</i> , <i>Calliarthron sp.</i> , <i>Corallina vancouveriensis</i> , <i>Gelidium coulteri</i> , <i>Gelidium sp.</i> , <i>Cystoclonium obtusangulum</i> , <i>Chondracanthus canaliculatus</i> , <i>Gigartina skottsbergii</i> , <i>Iridaea sp.</i> , <i>Mazzaella leptorhynchos</i> , <i>Hypnea sp.</i> , <i>Peyssonnelia sp.</i> , <i>Phacelocarpus neurymenioides</i> , <i>Portieria sp.</i> , <i>Callophycus serratus</i> , <i>Gracilaria edulis</i> , <i>Tricleocarpa cylindrica</i> , <i>Tricleocarpa fragilis</i> , <i>Palmaria decipiens</i> , <i>Plocamium cartilagineum</i> , <i>Plocamium sp.</i> |
| NCBI            | NCBI        | <i>Amphiroa fragilissima</i> , <i>Dichotomaria marginata</i>                                                                                                                                                                                                                                                                                                                                                                                                                                                                                                                                                                                                                                                                                                                                                                                                                                                                                                        |
| This study      | NCBI        | <i>Himantothallus grandifolius</i> , <i>Cystosphaera jacquinotii</i>                                                                                                                                                                                                                                                                                                                                                                                                                                                                                                                                                                                                                                                                                                                                                                                                                                                                                                |
| NA              | This study  | <i>Dictyota acutiloba</i> , <i>Dictyota sp.</i> , <i>Chnoospora implexa</i> , <i>Pelagophycus porra</i> , <i>Egregia menziesii</i> , <i>Ceramium sp.</i> , <i>Myriogramme smithii</i>                                                                                                                                                                                                                                                                                                                                                                                                                                                                                                                                                                                                                                                                                                                                                                               |
| NA              | NCBI        | <i>Gymnogongrus turquetii</i>                                                                                                                                                                                                                                                                                                                                                                                                                                                                                                                                                                                                                                                                                                                                                                                                                                                                                                                                       |
| No data         |             | <i>Neurymenia fraxinifolia</i> , <i>Amphiroa crassa</i> , <i>Actinotrichia sp.</i> , <i>Galaxaura sp.</i>                                                                                                                                                                                                                                                                                                                                                                                                                                                                                                                                                                                                                                                                                                                                                                                                                                                           |

33

34

35 Table S4. Accession numbers and information for supplemental sequences used in the  
 36 construction of phylogenies and in-house generated sequences.

| Species                            | Gene | Accession Number                                                                                                      |
|------------------------------------|------|-----------------------------------------------------------------------------------------------------------------------|
| <i>Amphiroa fragilissima</i>       | 18S  | KM044027; U60744                                                                                                      |
| <i>Dichotomaria marginata</i>      | 18S  | GQ227517-18                                                                                                           |
| <i>Amphiroa fragilissima</i>       | rbcL | KM044022; U04039                                                                                                      |
| <i>Dichotomaria marginata</i>      | rbcL | KC134339; AB117630; KP238504; AY688022-23;<br>AY688018-19; AY688017; KF752510-13;<br>AB258440-46; KU360125; KU321676; |
| <i>Gymnogongrus turquetti</i>      | rbcL | U04196; U22510; U27018-19                                                                                             |
| <i>Cystosphaera jaquinotii</i>     | rbcL | EF990250                                                                                                              |
| <i>Himantothallus grandifolius</i> | rbcL | GQ368320; AJ287850; HE866853; AJ287904                                                                                |
| Multiple species                   | Both | KY987557- 639                                                                                                         |

37

38

39

40 Figure S1. Maximum Parsimony Phylogeny based on 18S and *rbcL* sequences with 10,000  
 41 bootstrap replicates of a) Rhodophyta and b) Phaeophyta (strict consensus of 3 trees). Branch  
 42 lengths are under their corresponding branch and bootstrap values are identified by symbol based  
 43 on the legend. Seaweed origin is denoted by the colored circles (red = Fiji; black = CA, blue =  
 44 Antarctica).

### A) Rhodophyta

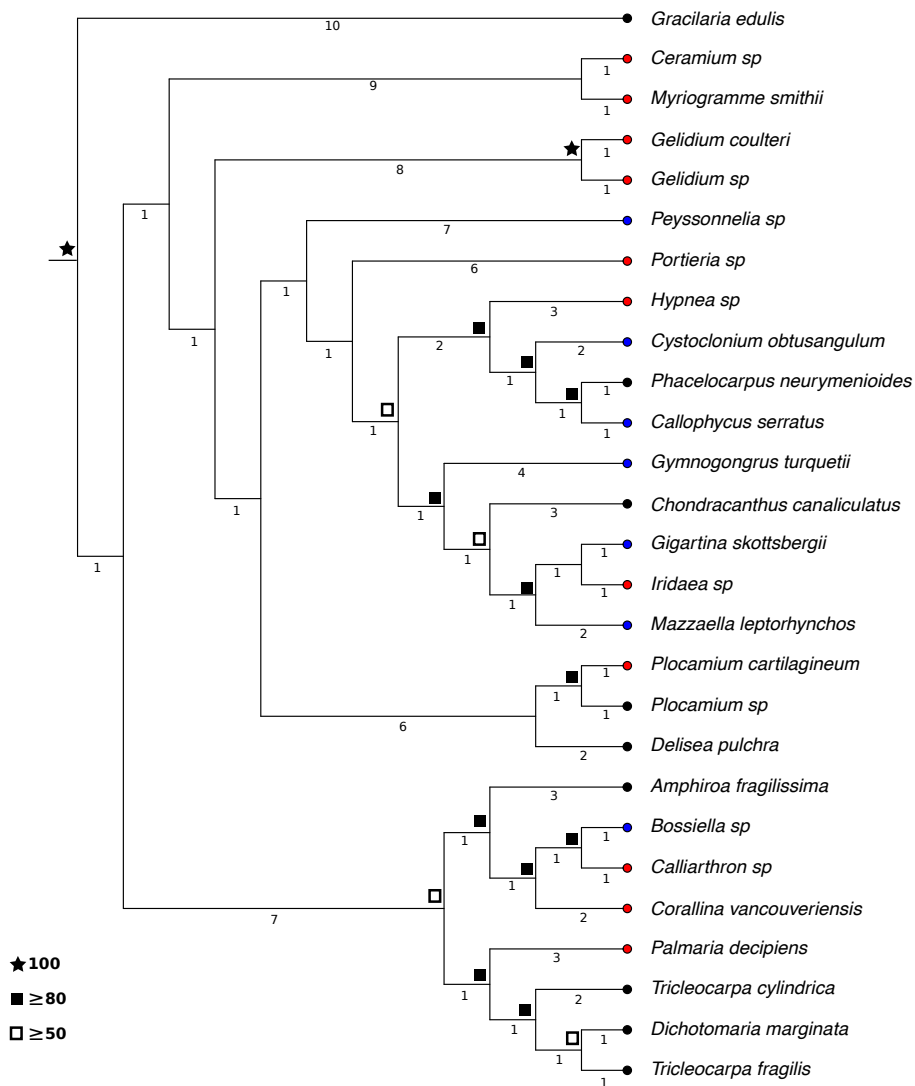

46

47

48

### B) Phaeophyta

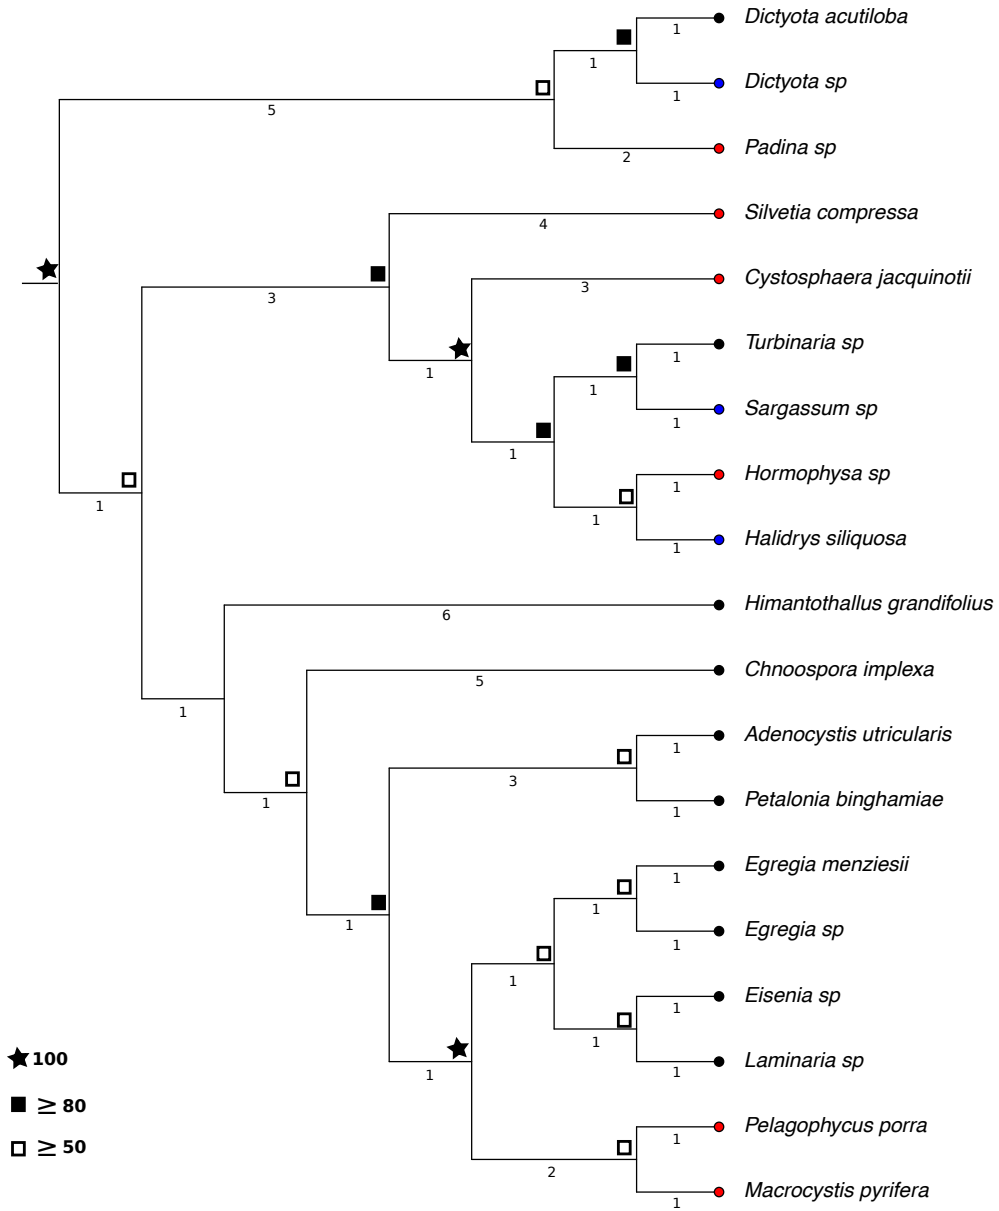

49

50

51 Figure S2. Maximum Likelihood Phylogeny based on 18S and *rbcL* sequences with 10,000  
 52 bootstrap replicates of a) Rhodophyta and b) Phaeophyta. Branch lengths are under their  
 53 corresponding branch and bootstrap values are identified by symbol based on the legend.  
 54 Seaweed origin is denoted by the colored circles (red = Fiji; black = CA, blue = Antarctica).  
 55 Unlabeled Phaeophyta branches have lengths of 1.3e-06.

56

### A) Rhodophyta

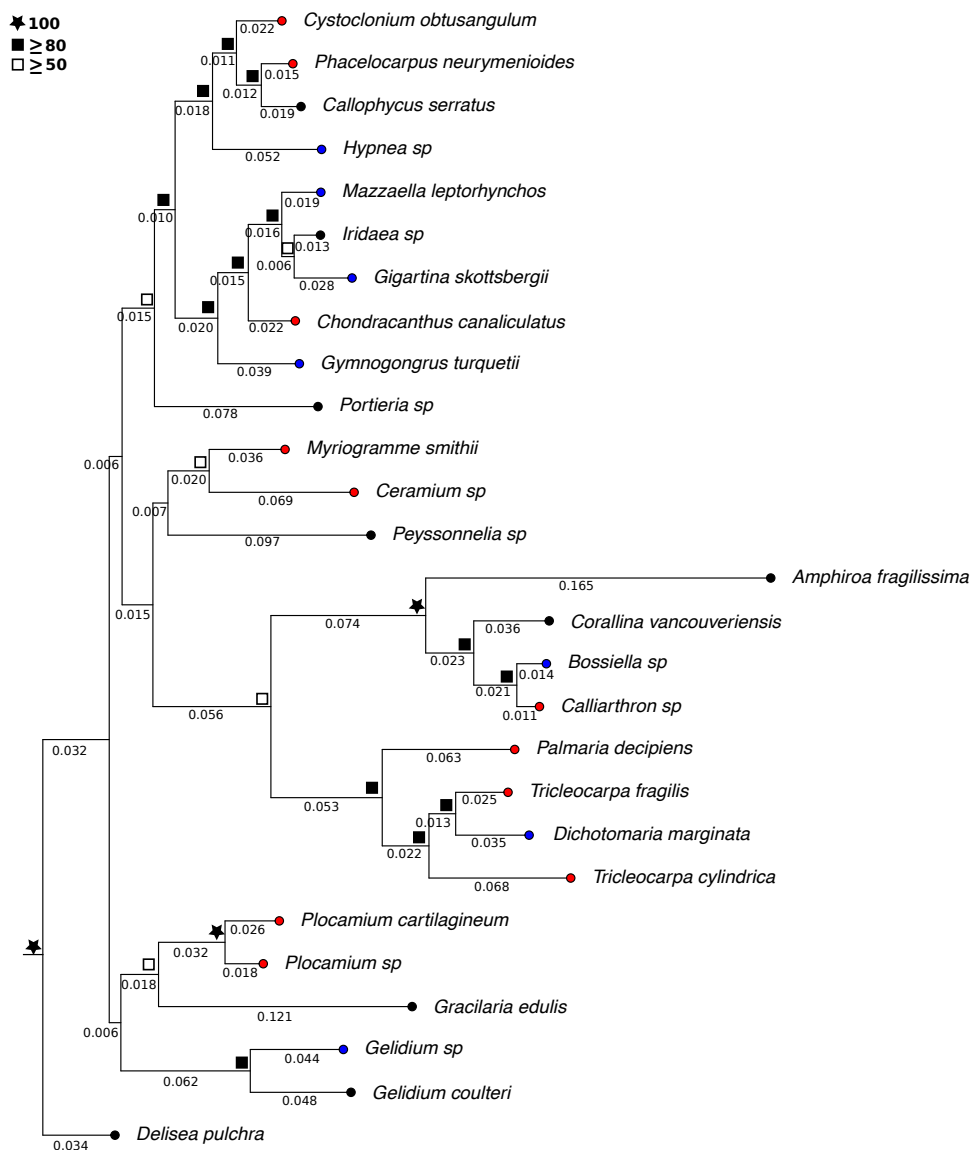

57

58



59

## B) Phaeophyta

60

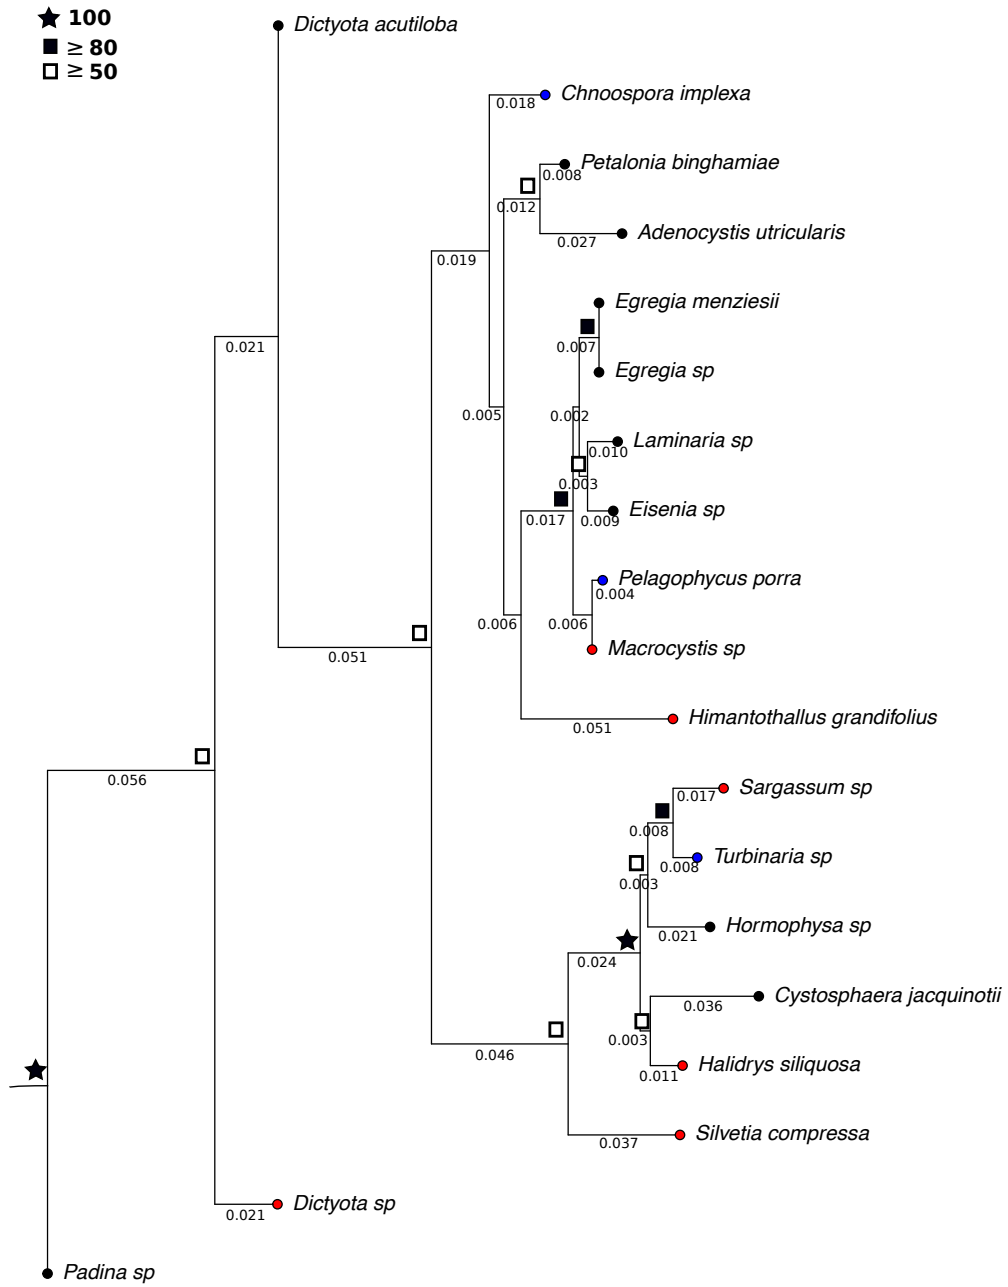

61

62

63 Figure S3. Seaweed traits plotted across collection sites. Per.n and per.c represent percent  
 64 nitrogen and carbon while c.n represents the carbon to nitrogen ratio. Percent ash-free dry mass  
 65 (afdm), percent protein (pro) and percent phenolics (phen) are also represented. All traits were  
 66 calculated as percentage per gram dry mass using lyophilized tissue.

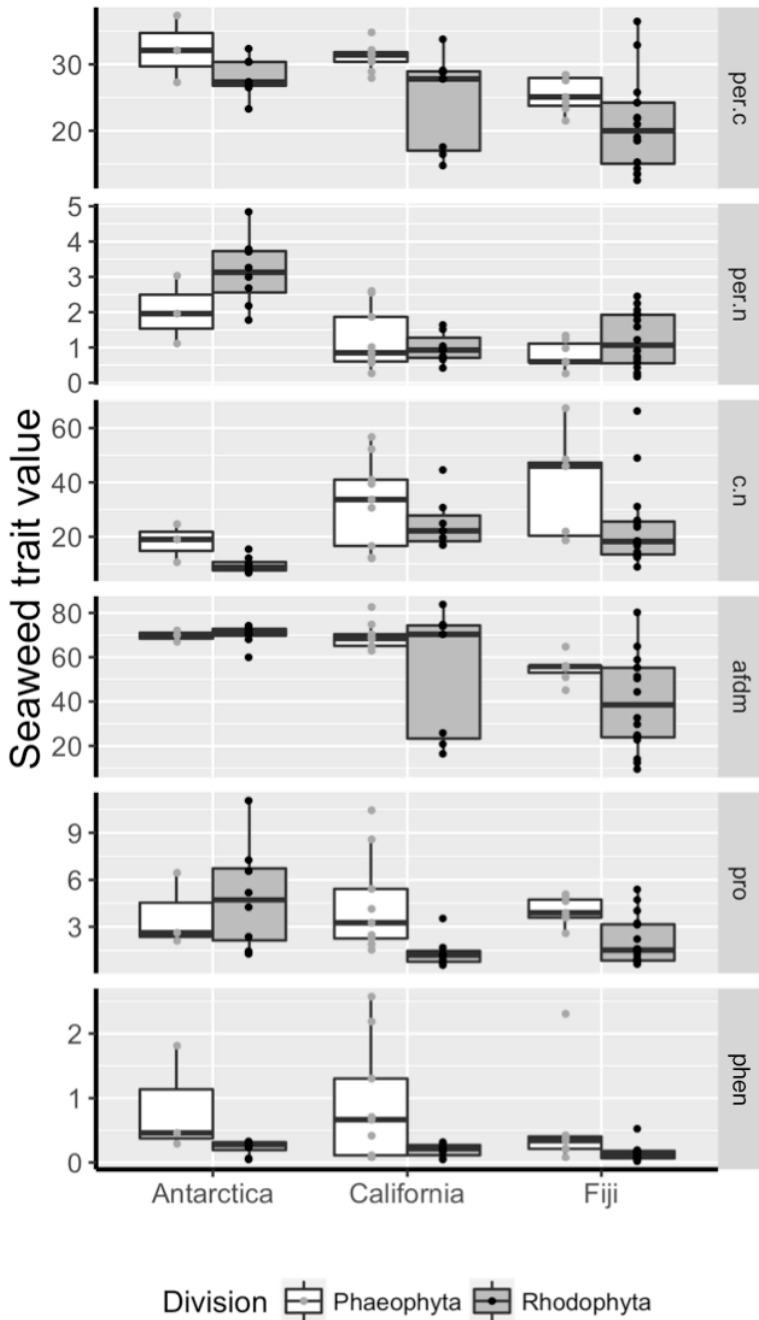

67

68

69 Figure S4. Palatability of Rhodophyta seaweeds (fleshy species only) to urchins depends on both  
 70 organic content and collection site. Calcified seaweeds excluded were *Tricleocarpa cylindrica*,  
 71 *T. fragilis*, *Amphiroa crassa*, *A. fragilissima*, *Galaxaura sp.*, *Dichotomaria marginata*,  
 72 *Actinotrichia sp.*, *Peyssonnelia sp.*, *Bossiella sp.*, *Calliarthron sp.*, and *Corallina*  
 73 *vancouveriensis*. Top panel regresses palatability against AFDM (percent ash-free dry mass per  
 74 unit dry mass) ( $F_{1,18} = 6.1$ , adj.  $r^2 = 0.210$ ,  $p=0.024$ ) while the bottom panel shows the boxplot  
 75 of their residuals against collection site ( $F_{2,17} = 2.8$ ,  $p = 0.092$ ). Point size in top panel indicates  
 76 average latitudinal distribution of genus.

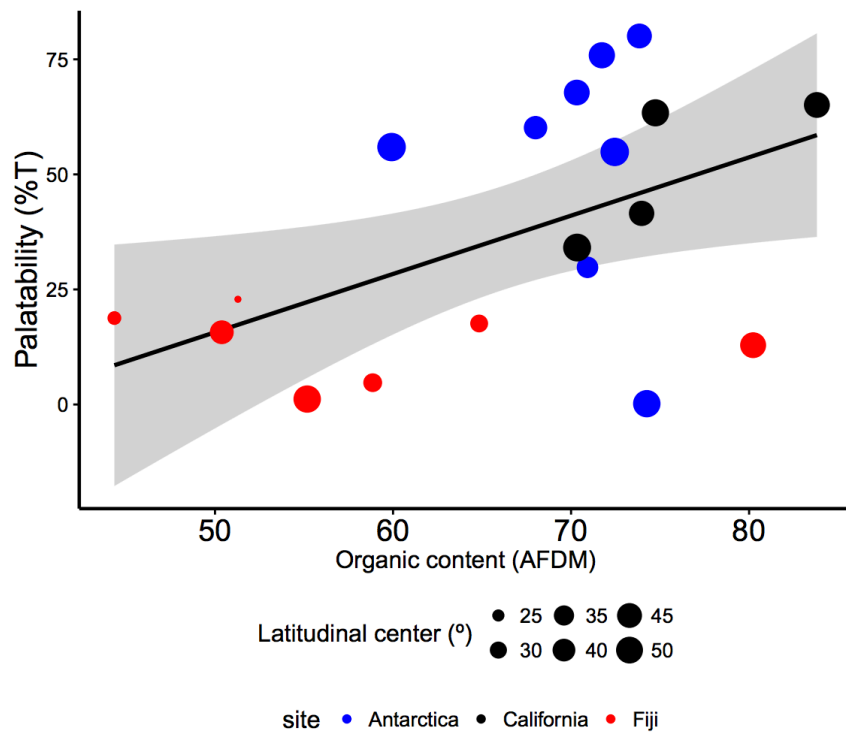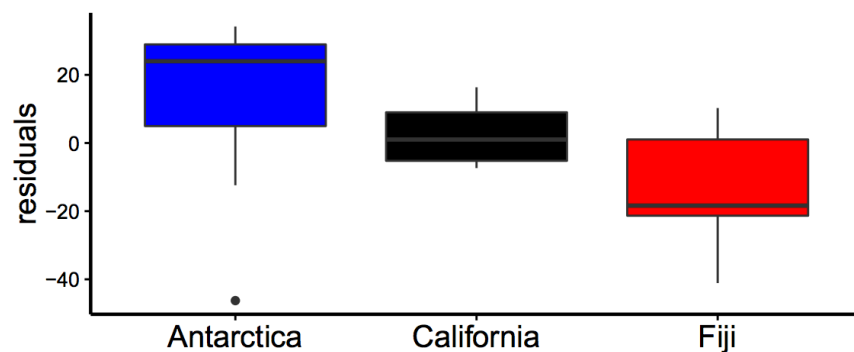

Supplement: NIHMS882506-supplement-Supp_AppendixS1.pdf [file NIHMS882506-supplement-Supp_AppendixS1.pdf]
